# Supplementary material for: Pyrethroid insecticide resistance of Aedes albopictus and Aedes aegypti (Diptera: Culicidae) across the Hawaiian Islands
Source: Parasit Vectors. 2025 Dec 5;19:17. doi: 10.1186/s13071-025-07176-1 (PMC12797669; doi:10.1186/s13071-025-07176-1)
Supplement: Supplementary file 1 — Additional file 1. [file 13071_2025_7176_MOESM1_ESM.xlsx]

## Sheet: Sheet1
Sample ID	Year	State	Island	SRA accession number
Ab20KAUA001	2020	Hawaii	Kauaʻi	SAMN47286276
Ab20KAUA002	2020	Hawaii	Kauaʻi	SAMN47286277
Ab20KAUA003	2020	Hawaii	Kauaʻi	SAMN47286278
Ab20KAUA004	2020	Hawaii	Kauaʻi	SAMN47286279
Ab22LIHU001	2022	Hawaii	Kauaʻi	SAMN47286280
Ab22LIHU002	2022	Hawaii	Kauaʻi	SAMN47286281
Ab22LIHU003	2022	Hawaii	Kauaʻi	SAMN47286282
Ab22LIHU004	2022	Hawaii	Kauaʻi	SAMN47286283
Ab22ETA1-002	2022	Hawaii	Oʻahu	SAMN47286284
Ab22HMR4-001	2022	Hawaii	Oʻahu	SAMN47286285
Ab22HMR4-002	2022	Hawaii	Oʻahu	SAMN47286286
Ab22HMR4-003	2022	Hawaii	Oʻahu	SAMN47286287
Ab22OSB7-001	2022	Hawaii	Oʻahu	SAMN47286288
Ab22OSB7-002	2022	Hawaii	Oʻahu	SAMN47286289
Ab22WSB-002	2022	Hawaii	Oʻahu	SAMN47286290
Ab22TA10-003	2022	Hawaii	Oʻahu	SAMN47286291
Ab22TA10-004	2022	Hawaii	Oʻahu	SAMN47286292
Ab22TMC7-001	2022	Hawaii	Oʻahu	SAMN47286293
Ab22TMC7-002	2022	Hawaii	Oʻahu	SAMN47286294
Ab23HNL001	2023	Hawaii	Oʻahu	SAMN47286295
Ab23HNL002	2023	Hawaii	Oʻahu	SAMN47286296
Ab23HNL003	2023	Hawaii	Oʻahu	SAMN47286297
Ab23HNL004	2023	Hawaii	Oʻahu	SAMN47286298
Ab23HNL005	2023	Hawaii	Oʻahu	SAMN47286299
Ab22HANA001	2022	Hawaii	Maui	SAMN47286300
Ab22HANA002	2022	Hawaii	Maui	SAMN47286301
Ab22HANA003	2022	Hawaii	Maui	SAMN47286302
Ab22KAHU001	2022	Hawaii	Maui	SAMN47286303
Ab22KAHU002	2022	Hawaii	Maui	SAMN47286304
Ab22KAHU003	2022	Hawaii	Maui	SAMN47286305
Ab22KAHU004	2022	Hawaii	Maui	SAMN47286306
Ab22KULA001	2022	Hawaii	Maui	SAMN47286307
Ab22KULA002	2022	Hawaii	Maui	SAMN47286308
Ab22KULA003	2022	Hawaii	Maui	SAMN47286309
Ab22KULA004	2022	Hawaii	Maui	SAMN47286310
Ab22WAIN003	2022	Hawaii	Maui	SAMN47286311
Ab22WAIN004	2022	Hawaii	Maui	SAMN47286312
Ab19KAWA001	2019	Hawaii	The Island of Hawaiʻi	SAMN47286313
Ab19MANU001	2019	Hawaii	The Island of Hawaiʻi	SAMN47286314
Ab19WAIO001	2019	Hawaii	The Island of Hawaiʻi	SAMN47286315
Ab21COOK001	2021	Hawaii	The Island of Hawaiʻi	SAMN47286316
Ab21HONAUN001	2021	Hawaii	The Island of Hawaiʻi	SAMN47286317
Ab22HONAUN021	2022	Hawaii	The Island of Hawaiʻi	SAMN47286318
Ab22HONAUN022	2022	Hawaii	The Island of Hawaiʻi	SAMN47286319
Ab22HONAUN023	2022	Hawaii	The Island of Hawaiʻi	SAMN47286320
Ab22HONAUN024	2022	Hawaii	The Island of Hawaiʻi	SAMN47286321
Ab22HONAUN101	2022	Hawaii	The Island of Hawaiʻi	SAMN47286322
Ab22HONAUN102	2022	Hawaii	The Island of Hawaiʻi	SAMN47286323
Ab21HONO001	2021	Hawaii	The Island of Hawaiʻi	SAMN47286324
Ab21HONO002	2021	Hawaii	The Island of Hawaiʻi	SAMN47286325
Ab21HONO003	2021	Hawaii	The Island of Hawaiʻi	SAMN47286326
Ab21HONO004	2021	Hawaii	The Island of Hawaiʻi	SAMN47286327
Ab21KAHENA101	2021	Hawaii	The Island of Hawaiʻi	SAMN47286328
Ab21KAHENA103	2021	Hawaii	The Island of Hawaiʻi	SAMN47286329
Ab21KAHENA104	2021	Hawaii	The Island of Hawaiʻi	SAMN47286330
Ab21KAHENA201	2021	Hawaii	The Island of Hawaiʻi	SAMN47286331
Ab21KALAPA101	2021	Hawaii	The Island of Hawaiʻi	SAMN47286332
Ab21KALAPA102	2021	Hawaii	The Island of Hawaiʻi	SAMN47286333
Ab21KALAPA103	2021	Hawaii	The Island of Hawaiʻi	SAMN47286334
Ab21KALAPA104	2021	Hawaii	The Island of Hawaiʻi	SAMN47286335
Ab21KOA001	2021	Hawaii	The Island of Hawaiʻi	SAMN47286336
Ab21KOA002	2021	Hawaii	The Island of Hawaiʻi	SAMN47286337
Ab21KOA003	2021	Hawaii	The Island of Hawaiʻi	SAMN47286338
Ab21KOA004	2021	Hawaii	The Island of Hawaiʻi	SAMN47286339
Ab21MIMA001	2021	Hawaii	The Island of Hawaiʻi	SAMN47286340
Ab21MIMA002	2021	Hawaii	The Island of Hawaiʻi	SAMN47286341
Ab21MIMA005	2021	Hawaii	The Island of Hawaiʻi	SAMN47286342
Ab21PUNALU001	2021	Hawaii	The Island of Hawaiʻi	SAMN47286343
Ab21SEAMM006	2021	Hawaii	The Island of Hawaiʻi	SAMN47286344
Ab21SEAMM007	2021	Hawaii	The Island of Hawaiʻi	SAMN47286345
Ab21SEAMM008	2021	Hawaii	The Island of Hawaiʻi	SAMN47286346
Ab21SEAMM009	2021	Hawaii	The Island of Hawaiʻi	SAMN47286347
Ab21SEAV001	2021	Hawaii	The Island of Hawaiʻi	SAMN47286348
Ab21SEAV101	2021	Hawaii	The Island of Hawaiʻi	SAMN47286349
Ab21SEAV102	2021	Hawaii	The Island of Hawaiʻi	SAMN47286350
Ab21SEAV103	2021	Hawaii	The Island of Hawaiʻi	SAMN47286351
Ab21SEAVP201	2021	Hawaii	The Island of Hawaiʻi	SAMN47286352
Ab21SEAVP202	2021	Hawaii	The Island of Hawaiʻi	SAMN47286353
Ab21SEAVP203	2021	Hawaii	The Island of Hawaiʻi	SAMN47286354
Ab21SHIPMN001	2021	Hawaii	The Island of Hawaiʻi	SAMN47286355
Ab21SHIPMN002	2021	Hawaii	The Island of Hawaiʻi	SAMN47286356
Ab21SHIPMN401	2021	Hawaii	The Island of Hawaiʻi	SAMN47286357
Ab21SHIPMN402	2021	Hawaii	The Island of Hawaiʻi	SAMN47286358
Ab21WHITBP001	2021	Hawaii	The Island of Hawaiʻi	SAMN47286359
Ab22UHIH001	2022	Hawaii	The Island of Hawaiʻi	SAMN47286360
Ab22UHIH002	2022	Hawaii	The Island of Hawaiʻi	SAMN47286361
Ab22UHIH003	2022	Hawaii	The Island of Hawaiʻi	SAMN47286362
Ae22UHIH001	2022	Hawaii	The Island of Hawaiʻi	SAMN47286363
AbKAHO113	2021	Hawaii	The Island of Hawaiʻi	SAMN47286364
AbKAHO114	2021	Hawaii	The Island of Hawaiʻi	SAMN47286365
AbKAHO115	2021	Hawaii	The Island of Hawaiʻi	SAMN47286366
AbKAHO116	2021	Hawaii	The Island of Hawaiʻi	SAMN47286367
Ab19HONA001	2019	Hawaii	The Island of Hawaiʻi	SAMN47286368
